# Supplementary material for: High-performance SiGe anode materials obtained by dealloying a Sr-modified Al–Si–Ge eutectic precursor
Source: Royal Society of Chemistry journal article supplement (doi:10.1039/d2ra07674h), 2023-01-01
Supplement: d2ra07674h1.pdf [file d2ra07674h1.pdf]

## Supplement

*EDS mapping results:*

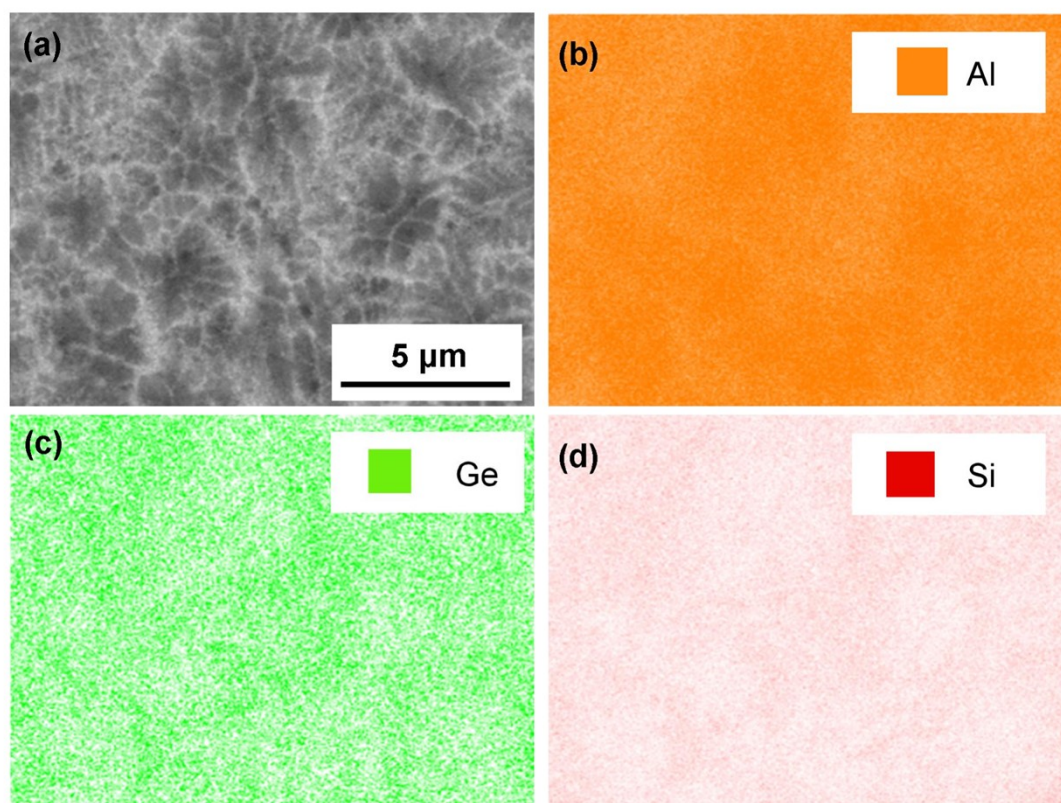

Fig. S1 (a) Back-scattered electron image of the cross-section of Sr-modified  $\text{Al}_{84.23}\text{Si}_{9.46}\text{Ge}_{6.31}$  ribbon and corresponding EDS mappings of (b) Al, (c) Ge and (d) Si.
